# Supplementary material for: The Influence of Radiotherapy on the Function of the Left and Right Ventricles in Relation to the Radiation Dose Administered to the Left Anterior Descending Coronary Artery—From a Cardiologist’s Point of View
Source: MDPI journal article supplement (doi:10.3390/cancers14102420), 2022-05-13
Supplement: s1 [file s1]

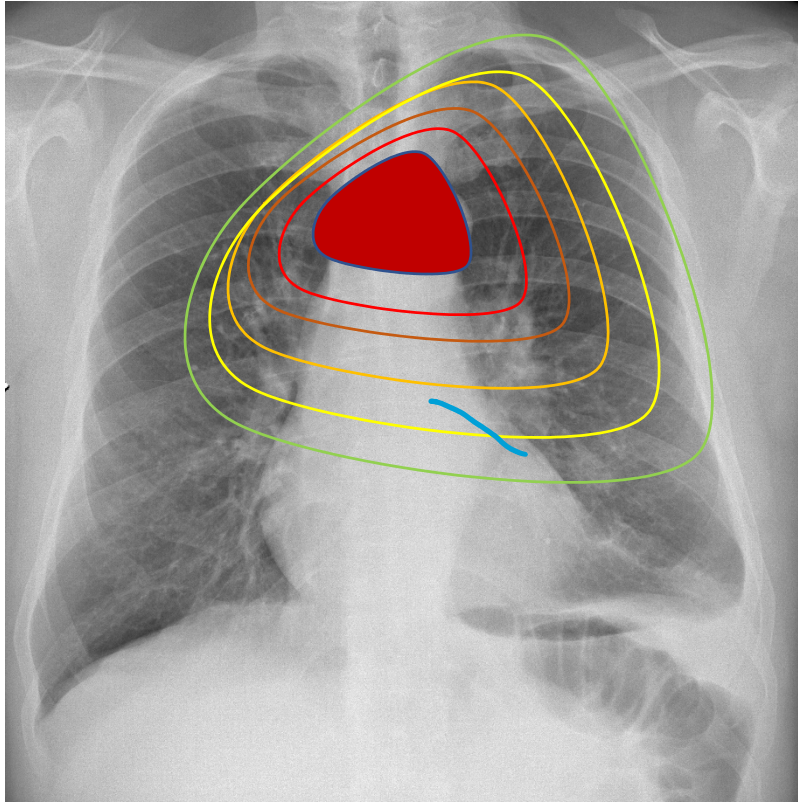

**Figure S1.** Schematic representation of dose distribution during mediastinal radiotherapy and the contour of the left anterior descending artery (in blue).

**Table S1.** Comparison of longitudinal strain analysis in patients treated with intensity-modulated radiation therapy (IMRT) and with other irradiation techniques.

|      | LV GLS<br>(patients treated<br>with IMRT) | LV GLS (patients<br>treated with other<br>techniques) | LV anterior wall<br>LS (patients<br>treated with<br>IMRT) | LV anterior wall<br>LS (patients<br>treated with other<br>techniques) | LV anteroseptal<br>wall LS (patients<br>treated with<br>IMRT) | LV anteroseptal<br>wall LS (patients<br>treated with other<br>techniques) |
|------|-------------------------------------------|-------------------------------------------------------|-----------------------------------------------------------|-----------------------------------------------------------------------|---------------------------------------------------------------|---------------------------------------------------------------------------|
| 1    | 18                                        | 14,7                                                  | 7.5                                                       | 14                                                                    | 13.5                                                          | 13.5                                                                      |
| 2    | 19                                        | 19                                                    | 17.5                                                      | 13.5                                                                  | 14                                                            | 14                                                                        |
| 3    | 14                                        | 19.7                                                  | 12.5                                                      | 10                                                                    | 14.5                                                          | 20.5                                                                      |
| 4    | 21                                        | 19.5                                                  | 21.5                                                      | 19                                                                    | 18                                                            | 22                                                                        |
| 5    | 20                                        | 17.2                                                  | 18                                                        | 18                                                                    | 12                                                            | 17.5                                                                      |
| 6    | 18.4                                      |                                                       | 16.5                                                      |                                                                       | 16                                                            |                                                                           |
| mean | 18.4                                      | 18.0                                                  | 15.6                                                      | 14.8                                                                  | 14.7                                                          | 17.5                                                                      |

LV – left ventricular, LS – longitudinal strain, LV GLS – LV global LS.

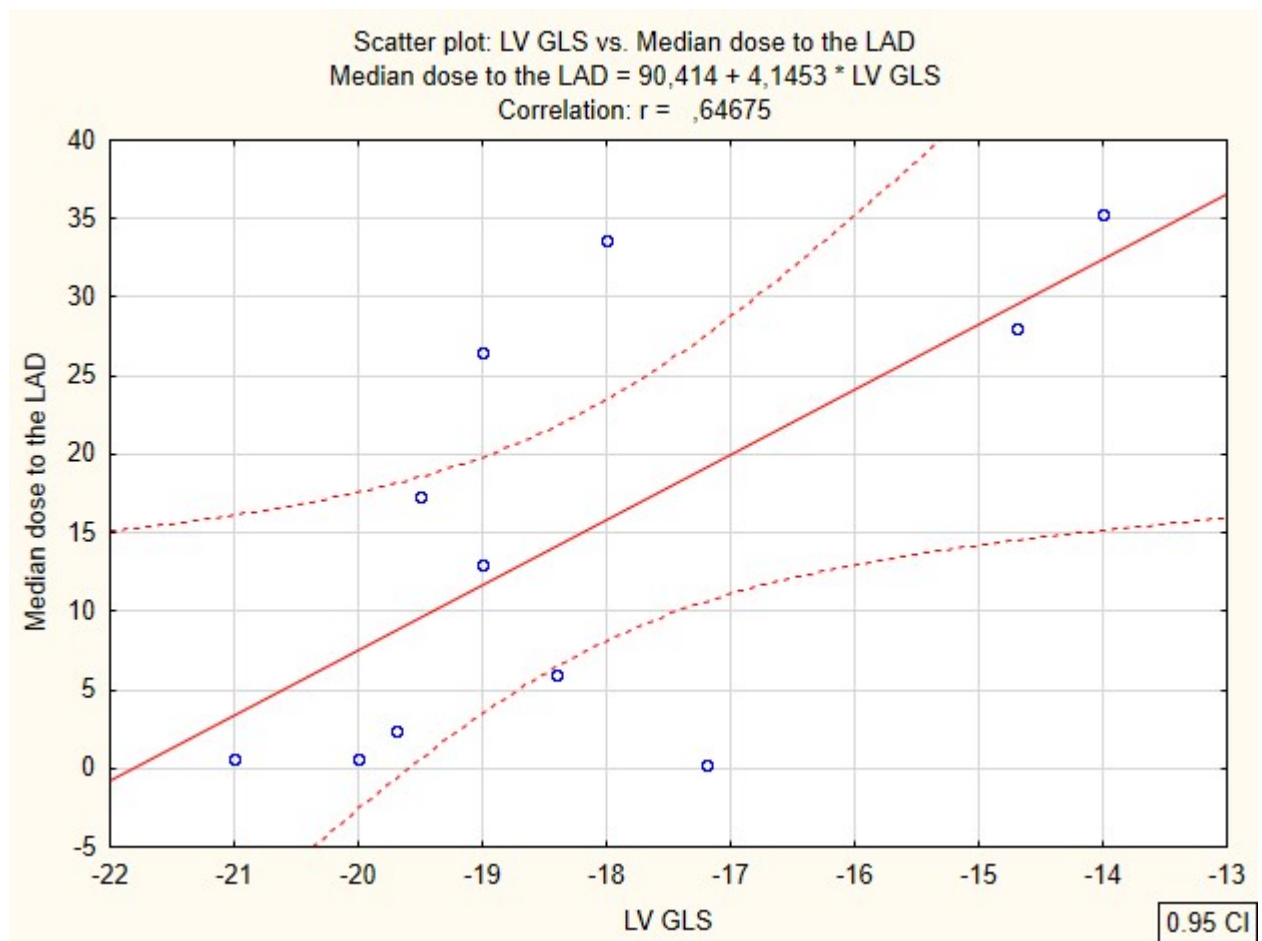

**Figure S2.** Correlation between the median dose administered during radiotherapy to the left descending (LAD) coronary artery and left ventricular global longitudinal strain (LV GLS) in echocardiography performed after a median 51 months from radiotherapy in the study group.

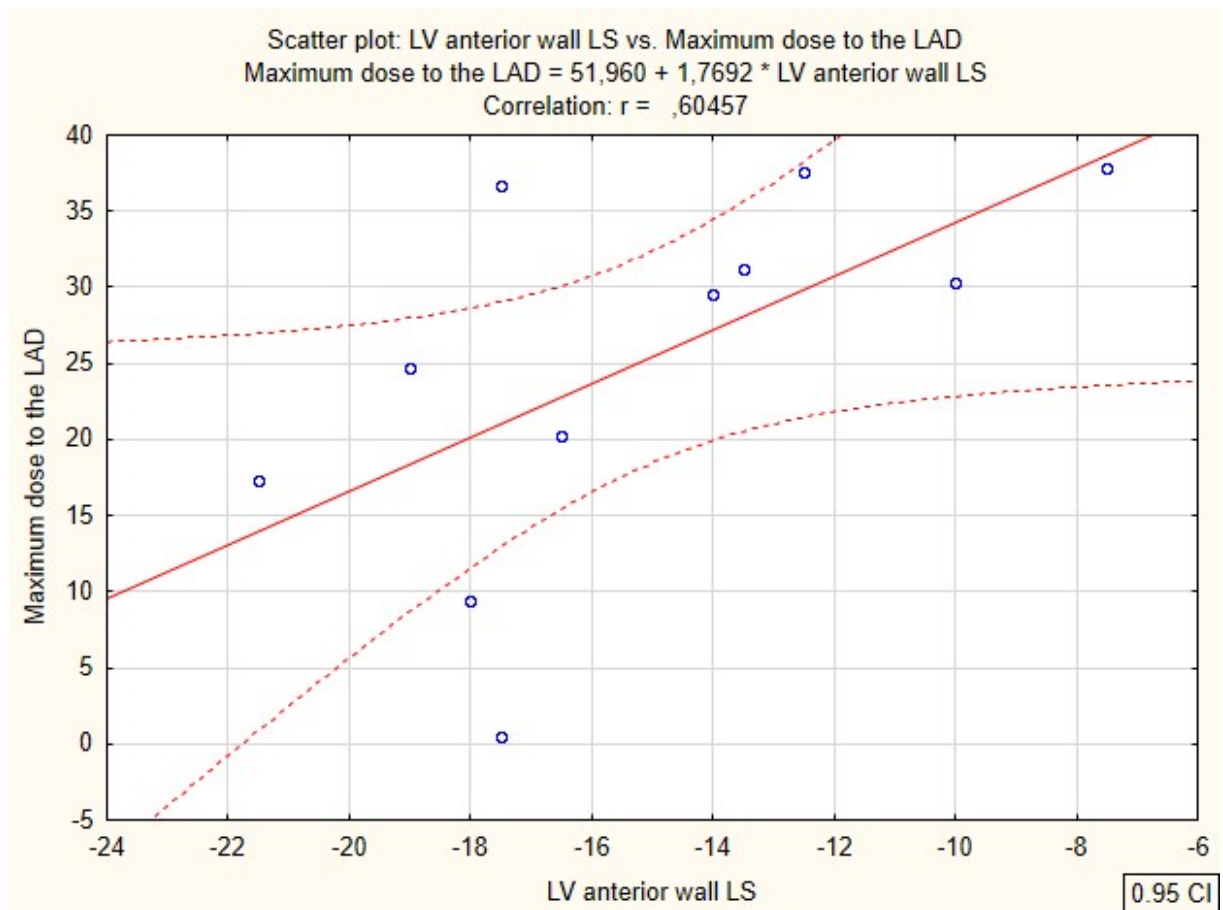

**Figure S3.** Correlation between the maximum dose administered during radiotherapy to the left descending (LAD) coronary artery and left ventricular anterior wall longitudinal strain in echocardiography performed after a median 51 months from radiotherapy in the study group.

Scatter plot: LV anterior wall LS vs. Median dose to the heart  
Correlation: Spearman's R = 0.772

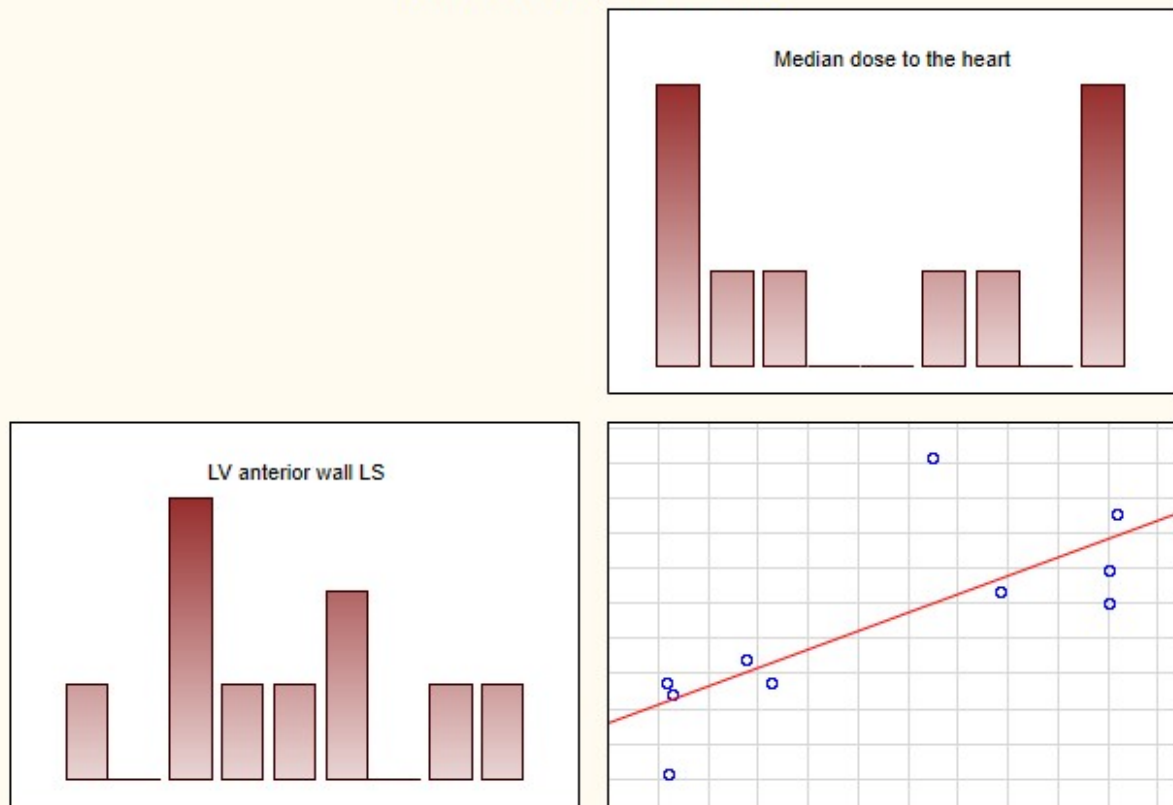

**Figure S4.** Correlation between the median dose administered during radiotherapy to the whole heart and left ventricular anterior wall longitudinal strain in echocardiography performed after a median 51 months from radiotherapy in the study group.

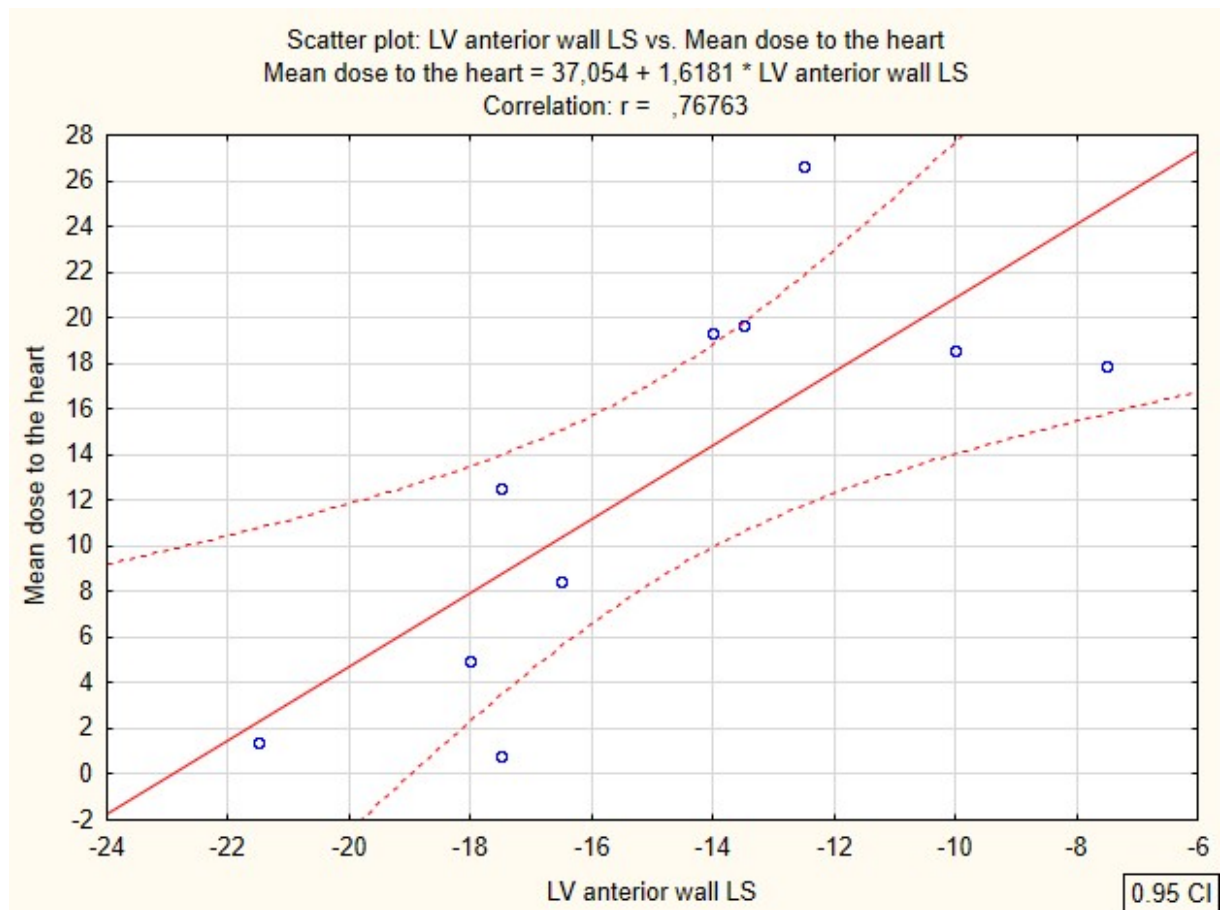

**Figure S5.** Correlation between the mean dose administered during radiotherapy to the whole heart and left ventricular anterior wall longitudinal strain in echocardiography performed after a median 51 months from radiotherapy in the study group.

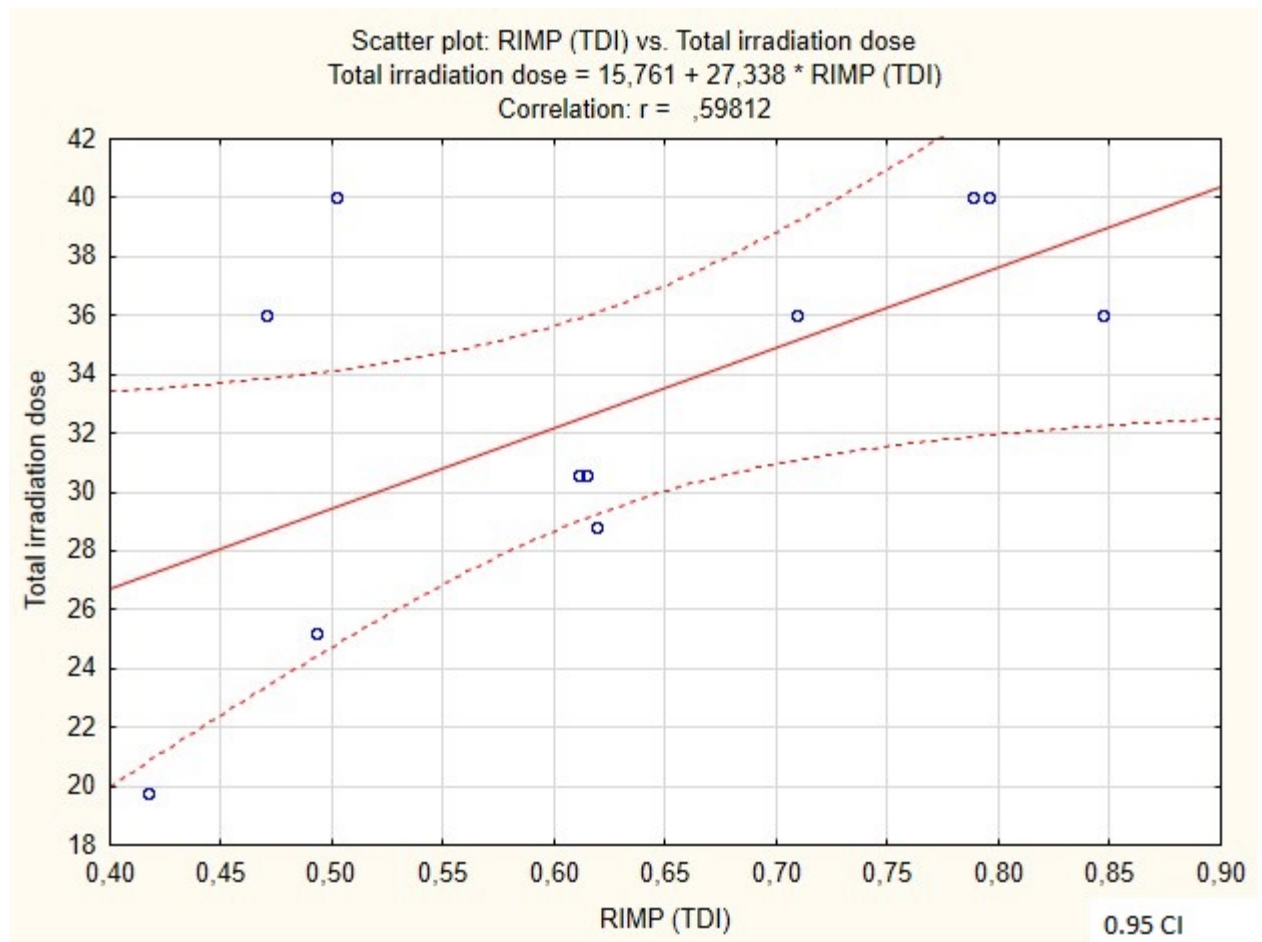

**Figure S6.** Correlation between the total irradiation dose and the right ventricular myocardial performance index (RIMP) obtained from tissue Doppler imaging (TDI) echocardiography performed after a median 51 months from radiotherapy in the study group.
